# Supplementary material for: A Sustainable Microgrid-oriented Energy Supplied Cement Supply Chain: A Bi-Objective Robust Fuzzy Programming Approach
Source: Research Square preprint supplement (doi:10.21203/rs.3.rs-5880741/v1), 2025-02-06
Supplement: Supplementary file 1 [file 71570392fce43b1f65c21393.docx]

sets

f /s1*s7,p1,p2,p3,j1*j16,m1,m2,k1*k3,t1*t4,tp1*tp24,o1,o2,o3/

s(f) suppliers /s1*s7/

p(f) potential plant /p1*p3/

j(f) potential distribution centers /j1*j16/

m(f) markets /m1*m2/

k(f) cement type /k1*k3/

t(f) time(Season) /t1*t4/

tp(f) time (hour)/tp1*tp24/

o(f) transportation mode/o1*o3/

i(f) /s1*s7,p1,p2,p3,j1*j16/

Ni1(i)/s1*s7/

Ni2(i)/p1,p2,p3/

Ni3(i)/j1*j16/

NS1(s) /s1*s4/

NS2(s) /s1*s6/

NS3(s) /s1*s7/

NP1(p) /p1/

NP2(p) /p2/

NP3(p) /p3/

NK1(k) /k1/

NK2(k) /k2/

NK3(k) /k3/

NJ1(j) /j1*j7/

NJ2(j) /j8*j16/

NM1(m) /m1/

NO1(O) /o1/

NO2(o) /o2/

NO3(o) /o3/

;

*----------------Demand Tables----------------

table D1(m,k,t)

t1 t2 t3 t4

m1.k1 80 500 100

m1.k2 160 80

m1.k3 80 160 450

m2.k1 160 80 100

m2.k2

m2.k3

;

table D2(m,k,t)

t1 t2 t3 t4

m1.k1 100 600 120

m1.k2 200 100

m1.k3 100 200 500

m2.k1 200 100 120

m2.k2

m2.k3

;

table D3(m,k,t)

t1 t2 t3 t4

m1.k1 120 700 140

m1.k2 240 120

m1.k3 120 240 580

m2.k1 240 120 140

m2.k2

m2.k3

;

table D4(m,k,t)

t1 t2 t3 t4

m1.k1 140 800 160

m1.k2 280 140

m1.k3 140 280 650

m2.k1 280 140 160

m2.k2

m2.k3

;

*----------------Income Table----------------

table Landa(m,k,t)

t1 t2 t3 t4

m1.k1 1100 1300 1500 1700

m1.k2 1400 1600 1800 2000

m1.k3 1900 2100 2300 2500

m2.k1 2300 2500 2700 2900

m2.k2

m2.k3

;

*----------------Inventory cost table----------------

table Alpha2(m,k,t)

t1 t2 t3 t4

m1.k1 2 2 2 2

m1.k2 2 2 2 2

m1.k3 2 2 2 2

m2.k1 2 2 2 2

m2.k2

m2.k3

;

*----------------Shortage cost table----------------

table Betha(m,k,t)

t1 t2 t3 t4

m1.k1 1 1 1 1

m1.k2 1 1 1 1

m1.k3 1 1 1 1

m2.k1 1 1 1 1

m2.k2

m2.k3

;

*----------------Production cost tables----------------

table cP1(k,t)

t1 t2 t3 t4

k1 2 2 2 2

k2 3 3 3 3

k3 4 4 4 4

;

table cP2(k,t)

t1 t2 t3 t4

k1 2.5 2.5 2.5 2.5

k2 3.25 3.25 3.25 3.25

k3 4.5 4.5 4.5 4.5

;

table cP3(k,t)

t1 t2 t3 t4

k1 3 3 3 3

k2 3.5 3.5 3.5 3.5

k3 4.75 5 5 5

;

table cP4(k,t)

t1 t2 t3 t4

k1 3.5 3.5 3.5 3.5

k2 4 4 4 4

k3 5 5.25 5.5 5.5

;

*----------------Electrical energy consumed tables----------------

table GammaAP1(i,t)

t1 t2 t3 t4

S1 48 60 44 42

S2 48 60 44 42

S3 48 60 44 42

S4 48 60 44 42

S5 48 60 44 42

S6 48 60 44 42

S7 48 60 44 42

;

table GammaAP2(i,t)

t1 t2 t3 t4

S1 58 70 54 52

S2 58 70 54 52

S3 58 70 54 52

S4 58 70 54 52

S5 58 70 54 52

S6 58 70 54 52

S7 58 70 54 52

;

table GammaAP3(i,t)

t1 t2 t3 t4

S1 68 80 64 62

S2 68 80 64 62

S3 68 80 64 62

S4 68 80 64 62

S5 68 80 64 62

S6 68 80 64 62

S7 68 80 64 62

;

table GammaAP4(i,t)

t1 t2 t3 t4

S1 78 90 74 72

S2 78 90 74 72

S3 78 90 74 72

S4 78 90 74 72

S5 78 90 74 72

S6 78 90 74 72

S7 78 90 74 72

;

table GammaBP1(i,t)

t1 t2 t3 t4

P1 120 150 110 105

P2 120 150 110 105

P3 120 150 110 105

;

table GammaBP2(i,t)

t1 t2 t3 t4

P1 130 160 120 115

P2 130 160 120 115

P3 130 160 120 115

;

table GammaBP3(i,t)

t1 t2 t3 t4

P1 140 170 130 125

P2 140 170 130 125

P3 140 170 130 125

;

table GammaBP4(i,t)

t1 t2 t3 t4

P1 150 180 140 135

P2 150 180 140 135

P3 150 180 140 135

;

table GammaCP1(i,t)

t1 t2 t3 t4

j1 2.4 3 2.2 2.1

j2 2.4 3 2.2 2.1

j3 2.4 3 2.2 2.1

j4 2.4 3 2.2 2.1

j5 2.4 3 2.2 2.1

j6 2.4 3 2.2 2.1

j7 2.4 3 2.2 2.1

j8 2.4 3 2.2 2.1

j9 2.4 3 2.2 2.1

j10 2.4 3 2.2 2.1

j11 2.4 3 2.2 2.1

j12 2.4 3 2.2 2.1

j13 2.4 3 2.2 2.1

j14 2.4 3 2.2 2.1

j15 2.4 3 2.2 2.1

j16 2.4 3 2.2 2.1

;

table GammaCP2(i,t)

t1 t2 t3 t4

j1 3.4 4 3.2 3.1

j2 3.4 4 3.2 3.1

j3 3.4 4 3.2 3.1

j4 3.4 4 3.2 3.1

j5 3.4 4 3.2 3.1

j6 3.4 4 3.2 3.1

j7 3.4 4 3.2 3.1

j8 3.4 4 3.2 3.1

j9 3.4 4 3.2 3.1

j10 3.4 4 3.2 3.1

j11 3.4 4 3.2 3.1

j12 3.4 4 3.2 3.1

j13 3.4 4 3.2 3.1

j14 3.4 4 3.2 3.1

j15 3.4 4 3.2 3.1

j16 3.4 4 3.2 3.1

;

table GammaCP3(i,t)

t1 t2 t3 t4

j1 4.4 5 4.2 4.1

j2 4.4 5 4.2 4.1

j3 4.4 5 4.2 4.1

j4 4.4 5 4.2 4.1

j5 4.4 5 4.2 4.1

j6 4.4 5 4.2 4.1

j7 4.4 5 4.2 4.1

j8 4.4 5 4.2 4.1

j9 4.4 5 4.2 4.1

j10 4.4 5 4.2 4.1

j11 4.4 5 4.2 4.1

j12 4.4 5 4.2 4.1

j13 4.4 5 4.2 4.1

j14 4.4 5 4.2 4.1

j15 4.4 5 4.2 4.1

j16 4.4 5 4.2 4.1

;

table GammaCP4(i,t)

t1 t2 t3 t4

j1 5.4 6 5.2 5.1

j2 5.4 6 5.2 5.1

j3 5.4 6 5.2 5.1

j4 5.4 6 5.2 5.1

j5 5.4 6 5.2 5.1

j6 5.4 6 5.2 5.1

j7 5.4 6 5.2 5.1

j8 5.4 6 5.2 5.1

j9 5.4 6 5.2 5.1

j10 5.4 6 5.2 5.1

j11 5.4 6 5.2 5.1

j12 5.4 6 5.2 5.1

j13 5.4 6 5.2 5.1

j14 5.4 6 5.2 5.1

j15 5.4 6 5.2 5.1

j16 5.4 6 5.2 5.1

;

*----------------Market price Tables----------------

table RhoMarket1(t,tp)

tp1 tp2 tp3 tp4 tp5 tp6 tp7 tp8 tp9 tp10 tp11 tp12 tp13 tp14 tp15 tp16 tp17 tp18 tp19 tp20 tp21 tp22 tp23 tp24

t1 0.504 0.5344 0.4376 0.4228 0.5328 0.5448 0.3724 0.5547 0.5641 0.5535 0.6359 0.6344 0.6759 0.6298 0.4376 0.54 0.5462 0.5734 0.6327 0.4907 0.3925 0.3561 0.4781 0.4102

t2 0.4376 0.3646 0.3646 0.4376 0.3646 0.4797 0.4846 0.4797 0.4689 0.2975 0.3388 0.3388 0.4597 0.4766 0.4288 0.4288 0.4288 0.6072 0.6405 0.7149 0.4576 0.3397 0.3975 0.4777

t3 0.4697 0.4697 0.4376 0.4376 0.4686 0.4922 0.5064 1.2826 0.5016 0.4202 0.385 0.2904 0.2637 0.2684 0.3461 0.4662 0.5056 1.3406 0.9998 0.9135 0.5106 0.4376 0.5136 0.4961

t4 0.2706 0.2698 0.2696 0.2694 0.2694 0.3061 0.3061 0.2711 0.2618 0.27 0.2711 0.38 0.4242 0.3438 0.3584 0.3756 0.4384 0.8622 0.9635 1.0086 1.0406 0.4384 0.4566 0.5019

;

table RhoMarket2(t,tp)

tp1 tp2 tp3 tp4 tp5 tp6 tp7 tp8 tp9 tp10 tp11 tp12 tp13 tp14 tp15 tp16 tp17 tp18 tp19 tp20 tp21 tp22 tp23 tp24

t1 0.604 0.6344 0.5376 0.5228 0.6328 0.6448 0.4724 0.6547 0.6641 0.6535 0.7359 0.7344 0.7759 0.7298 0.5376 0.64 0.6462 0.6734 0.7327 0.5907 0.4925 0.4561 0.5781 0.5102

t2 0.5376 0.4646 0.4646 0.5376 0.4646 0.5797 0.5846 0.5797 0.5689 0.3975 0.4388 0.4388 0.5597 0.5766 0.5288 0.5288 0.5288 0.7072 0.7405 0.8149 0.5576 0.4397 0.4975 0.5777

t3 0.5697 0.5697 0.5376 0.5376 0.5686 0.5922 0.6064 1.3826 0.6016 0.5202 0.485 0.3904 0.3637 0.3684 0.4461 0.5662 0.6056 1.4406 1.0998 1.0135 0.6106 0.5376 0.6136 0.5961

t4 0.3706 0.3698 0.3696 0.3694 0.3694 0.4061 0.4061 0.3711 0.3618 0.37 0.3711 0.48 0.5242 0.4438 0.4584 0.4756 0.5384 0.9622 1.0635 1.1086 1.1406 0.5384 0.5566 0.6019

;

table RhoMarket3(t,tp)

tp1 tp2 tp3 tp4 tp5 tp6 tp7 tp8 tp9 tp10 tp11 tp12 tp13 tp14 tp15 tp16 tp17 tp18 tp19 tp20 tp21 tp22 tp23 tp24

t1 0.704 0.7344 0.6376 0.6228 0.7328 0.7448 0.5724 0.7547 0.7641 0.7535 0.8359 0.8344 0.8759 0.8298 0.6376 0.74 0.7462 0.7734 0.8327 0.6907 0.5925 0.5561 0.6781 0.6102

t2 0.6376 0.5646 0.5646 0.6376 0.5646 0.6797 0.6846 0.6797 0.6689 0.4975 0.5388 0.5388 0.6597 0.6766 0.6288 0.6288 0.6288 0.8072 0.8405 0.9149 0.6576 0.5397 0.5975 0.6777

t3 0.6697 0.6697 0.6376 0.6376 0.6686 0.6922 0.7064 1.4826 0.7016 0.6202 0.585 0.4904 0.4637 0.4684 0.5461 0.6662 0.7056 1.5406 1.1998 1.1135 0.7106 0.6376 0.7136 0.6961

t4 0.4706 0.4698 0.4696 0.4694 0.4694 0.5061 0.5061 0.4711 0.4618 0.47 0.4711 0.58 0.6242 0.5438 0.5584 0.5756 0.6384 1.0622 1.1635 1.2086 1.2406 0.6384 0.6566 0.7019

;

table RhoMarket4(t,tp)

tp1 tp2 tp3 tp4 tp5 tp6 tp7 tp8 tp9 tp10 tp11 tp12 tp13 tp14 tp15 tp16 tp17 tp18 tp19 tp20 tp21 tp22 tp23 tp24

t1 0.804 0.8344 0.7376 0.7228 0.8328 0.8448 0.6724 0.8547 0.8641 0.8535 0.9359 0.9344 0.9759 0.9298 0.7376 0.84 0.8462 0.8734 0.6327 0.7907 0.6925 0.6561 0.7781 0.7102

t2 0.7376 0.6646 0.6646 0.7376 0.6646 0.7797 0.7846 0.7797 0.7689 0.5975 0.6388 0.6388 0.7597 0.7766 0.7288 0.7288 0.7288 0.9072 0.6405 1.0149 0.7576 0.6397 0.6975 0.7777

t3 0.7697 0.7697 0.7376 0.7376 0.7686 0.7922 0.8064 1.5826 0.8016 0.7202 0.685 0.5904 0.5637 0.5684 0.6461 0.7662 0.8056 1.6406 1.2998 1.2135 0.8106 0.7376 0.8136 0.7961

t4 0.5706 0.5698 0.5696 0.5694 0.5694 0.6061 0.6061 0.5711 0.5618 0.57 0.5711 0.68 0.7242 0.6438 0.6584 0.6756 0.7384 1.1622 1.2635 1.3086 1.3406 0.7384 0.7566 0.8019

;

scalar

Ccap/750000/

Phi/90/

Omega/24/

;

parameters

cRM1(s,p,k,o,t)

cRM2(s,p,k,o,t)

cRM3(s,p,k,o,t)

cRM4(s,p,k,o,t)

cH1(j,k,t)

cH2(j,k,t)

cH3(j,k,t)

cH4(j,k,t)

cT1(s,p,k,o,t)

cT2(s,p,k,o,t)

cT3(s,p,k,o,t)

cT4(s,p,k,o,t)

cT11(p,j,k,o,t)

cT12(p,j,k,o,t)

cT13(p,j,k,o,t)

cT14(p,j,k,o,t)

cT21(j,m,k,o,t)

cT22(j,m,k,o,t)

cT23(j,m,k,o,t)

cT24(j,m,k,o,t)

cap(f)

Cap1(s,k)

RhoG1(i,t,tp)

RhoG2(i,t,tp)

RhoG3(i,t,tp)

RhoG4(i,t,tp)

RhoCH1(i,t,tp)

RhoCH2(i,t,tp)

RhoCH3(i,t,tp)

RhoCH4(i,t,tp)

RhoDC1(i,t,tp)

RhoDC2(i,t,tp)

RhoDC3(i,t,tp)

RhoDC4(i,t,tp)

PBarG(i)

PBarCH(i)

PBarDCH(i)

NUch1(i)

NUch2(i)

NUch3(i)

NUch4(i)

NUdch1(i)

NUdch2(i)

NUdch3(i)

NUdch4(i)

ElowES(i)

EhighES(i)

ceRM1(s,p,k,o,t)

ceRM2(s,p,k,o,t)

ceRM3(s,p,k,o,t)

ceRM4(s,p,k,o,t)

ceT1(s,p,k,o,t)

ceT2(s,p,k,o,t)

ceT3(s,p,k,o,t)

ceT4(s,p,k,o,t)

ceP1(p,j,k,o,t)

ceP2(p,j,k,o,t)

ceP3(p,j,k,o,t)

ceP4(p,j,k,o,t)

ceH1(j,k,t)

ceH2(j,k,t)

ceH3(j,k,t)

ceH4(j,k,t)

ceT11(p,j,k,o,t)

ceT12(p,j,k,o,t)

ceT13(p,j,k,o,t)

ceT14(p,j,k,o,t)

ceT21(j,m,k,o,t)

ceT22(j,m,k,o,t)

ceT23(j,m,k,o,t)

ceT24(j,m,k,o,t)

AlphaRM1(s,p,k,o,t)

AlphaRM2(s,p,k,o,t)

AlphaRM3(s,p,k,o,t)

AlphaRM4(s,p,k,o,t)

AlphaT1(s,p,k,o,t)

AlphaT2(s,p,k,o,t)

AlphaT3(s,p,k,o,t)

AlphaT4(s,p,k,o,t)

AlphaP1(p,j,k,o,t)

AlphaP2(p,j,k,o,t)

AlphaP3(p,j,k,o,t)

AlphaP4(p,j,k,o,t)

AlphaT11(p,j,k,o,t)

AlphaT12(p,j,k,o,t)

AlphaT13(p,j,k,o,t)

AlphaT14(p,j,k,o,t)

AlphaT21(j,m,k,o,t)

AlphaT22(j,m,k,o,t)

AlphaT23(j,m,k,o,t)

AlphaT24(j,m,k,o,t)

;

*----------------------------------------

cRM1("s1",p,"k1",o,t)=.45;

cRM1("s2",p,"k1",o,t)=2.2;

cRM1("s3",p,"k1",o,t)=.14;

cRM1("s4",p,"k1",o,t)=.7;

cRM1("s1",p,"k2",o,t)=.25;

cRM1("s2",p,"k2",o,t)=2.8;

cRM1("s3",p,"k2",o,t)=.18;

cRM1("s4",p,"k2",o,t)=.91;

cRM1("s5",p,"k2",o,t)=.06;

cRM1("s6",p,"k2",o,t)=.27;

cRM1("s1",p,"k3",o,t)=.25;

cRM1("s2",p,"k3",o,t)=2.8;

cRM1("s3",p,"k3",o,t)=.18;

cRM1("s4",p,"k3",o,t)=.91;

cRM1("s5",p,"k3",o,t)=.06;

cRM1("s6",p,"k3",o,t)=.27;

cRM1("s7",p,k,o,t)=.5;

cRM2("s1",p,"k1",o,t)=.65;

cRM2("s2",p,"k1",o,t)=2.4;

cRM2("s3",p,"k1",o,t)=.34;

cRM2("s4",p,"k1",o,t)=.9;

cRM2("s1",p,"k2",o,t)=.45;

cRM2("s2",p,"k2",o,t)=3;

cRM2("s3",p,"k2",o,t)=.38;

cRM2("s4",p,"k2",o,t)=1.1;

cRM2("s5",p,"k2",o,t)=.26;

cRM2("s6",p,"k2",o,t)=.47;

cRM2("s1",p,"k3",o,t)=.45;

cRM2("s2",p,"k3",o,t)=3;

cRM2("s3",p,"k3",o,t)=.38;

cRM2("s4",p,"k3",o,t)=1.1;

cRM2("s5",p,"k3",o,t)=.26;

cRM2("s6",p,"k3",o,t)=.47;

cRM2("s7",p,k,o,t)=.7;

cRM3("s1",p,"k1",o,t)=.85;

cRM3("s2",p,"k1",o,t)=2.6;

cRM3("s3",p,"k1",o,t)=.54;

cRM3("s4",p,"k1",o,t)=1.1;

cRM3("s1",p,"k2",o,t)=.65;

cRM3("s2",p,"k2",o,t)=3.2;

cRM3("s3",p,"k2",o,t)=.58;

cRM3("s4",p,"k2",o,t)=1.3;

cRM3("s5",p,"k2",o,t)=.46;

cRM3("s6",p,"k2",o,t)=.67;

cRM3("s1",p,"k3",o,t)=.65;

cRM3("s2",p,"k3",o,t)=3.2;

cRM3("s3",p,"k3",o,t)=.58;

cRM3("s4",p,"k3",o,t)=1.3;

cRM3("s5",p,"k3",o,t)=.46;

cRM3("s6",p,"k3",o,t)=.67;

cRM3("s7",p,k,o,t)=.9;

cRM4("s1",p,"k1",o,t)=1;

cRM4("s2",p,"k1",o,t)=2.8;

cRM4("s3",p,"k1",o,t)=.74;

cRM4("s4",p,"k1",o,t)=1.3;

cRM4("s1",p,"k2",o,t)=.85;

cRM4("s2",p,"k2",o,t)=3.4;

cRM4("s3",p,"k2",o,t)=.78;

cRM4("s4",p,"k2",o,t)=1.5;

cRM4("s5",p,"k2",o,t)=.66;

cRM4("s6",p,"k2",o,t)=.87;

cRM4("s1",p,"k3",o,t)=.85;

cRM4("s2",p,"k3",o,t)=3.4;

cRM4("s3",p,"k3",o,t)=.78;

cRM4("s4",p,"k3",o,t)=1.5;

cRM4("s5",p,"k3",o,t)=.66;

cRM4("s6",p,"k3",o,t)=.87;

cRM4("s7",p,k,o,t)=1.1;

*----------------------------------------

cH1(j,"k1",t)=.5;

cH1(j,"k2",t)=.65;

cH1(j,"k3",t)=.9;

cH2(j,"k1",t)=.7;

cH2(j,"k2",t)=.85;

cH2(j,"k3",t)=1.1;

cH3(j,"k1",t)=.9;

cH3(j,"k2",t)=1.05;

cH3(j,"k3",t)=1.3;

cH4(j,"k1",t)=1.1;

cH4(j,"k2",t)=1.25;

cH4(j,"k3",t)=1.5;

*----------------------------------------

cT1(s,p,k,o,t)=.2;

cT2(s,p,k,o,t)=.25;

cT3(s,p,k,o,t)=.3;

cT4(s,p,k,o,t)=.35;

cT11(p,j,k,o,t)=.6;

cT12(p,j,k,o,t)=.65;

cT13(p,j,k,o,t)=.7;

cT14(p,j,k,o,t)=.75;

cT21(j,"m1","k1",o,t)=1;

cT21(j,"m1","k2",o,t)=1.6;

cT21(j,"m1","k3",o,t)=2.6;

cT21(j,"m2","k1",o,t)=3.4;

cT22(j,"m1","k1",o,t)=1.2;

cT22(j,"m1","k2",o,t)=1.8;

cT22(j,"m1","k3",o,t)=2.8;

cT22(j,"m2","k1",o,t)=3.6;

cT23(j,"m1","k1",o,t)=1.4;

cT23(j,"m1","k2",o,t)=2;

cT23(j,"m1","k3",o,t)=3;

cT23(j,"m2","k1",o,t)=3.8;

cT24(j,"m1","k1",o,t)=1.6;

cT24(j,"m1","k2",o,t)=2.2;

cT24(j,"m1","k3",o,t)=3.2;

cT24(j,"m2","k1",o,t)=4;

*----------------------------------------

Cap(p)=uniformint(1000,1200);

Cap(j)=uniformint(700,800);

Cap1(s,k)=uniformint(4000,6500);

*----------------------------------------

*----------------------------------------

*----------------------------------------

*----------------------------------------

*----------------------------------------

RhoG1(i,t,tp)=.2;

RhoG2(i,t,tp)=.3;

RhoG3(i,t,tp)=.4;

RhoG4(i,t,tp)=.5;

RhoCH1(i,t,tp)=0.15;

RhoCH2(i,t,tp)=0.20;

RhoCH3(i,t,tp)=0.25;

RhoCH4(i,t,tp)=0.30;

RhoDC1(i,t,tp)=0.15;

RhoDC2(i,t,tp)=0.20;

RhoDC3(i,t,tp)=0.25;

RhoDC4(i,t,tp)=0.30;

*----------------------------------------

PBarG("s1")=10;

PBarG("s2")=10;

PBarG("s3")=10;

PBarG("s4")=10;

PBarG("s5")=10;

PBarG("s6")=10;

PBarG("s7")=10;

PBarCH("s1")=5;

PBarCH("s2")=5;

PBarCH("s3")=5;

PBarCH("s4")=5;

PBarCH("s5")=5;

PBarCH("s6")=5;

PBarCH("s7")=5;

PBarDCH("s1")=5;

PBarDCH("s2")=5;

PBarDCH("s3")=5;

PBarDCH("s4")=5;

PBarDCH("s5")=5;

PBarDCH("s6")=5;

PBarDCH("s7")=5;

NUch1("s1")=0.95;

NUch1("s2")=0.95;

NUch1("s3")=0.95;

NUch1("s4")=0.95;

NUch1("s5")=0.95;

NUch1("s6")=0.95;

NUch1("s7")=0.95;

NUch2("s1")=1;

NUch2("s2")=1;

NUch2("s3")=1;

NUch2("s4")=1;

NUch2("s5")=1;

NUch2("s6")=1;

NUch2("s7")=1;

NUch3("s1")=1.05;

NUch3("s2")=1.05;

NUch3("s3")=1.05;

NUch3("s4")=1.05;

NUch3("s5")=1.05;

NUch3("s6")=1.05;

NUch3("s7")=1.05;

NUch4("s1")=1.1;

NUch4("s2")=1.1;

NUch4("s3")=1.1;

NUch4("s4")=1.1;

NUch4("s5")=1.1;

NUch4("s6")=1.1;

NUch4("s7")=1.1;

NUdch1("s1")=0.95;

NUdch1("s2")=0.95;

NUdch1("s3")=0.95;

NUdch1("s4")=0.95;

NUdch1("s5")=0.95;

NUdch1("s6")=0.95;

NUdch1("s7")=0.95;

NUdch2("s1")=1;

NUdch2("s2")=1;

NUdch2("s3")=1;

NUdch2("s4")=1;

NUdch2("s5")=1;

NUdch2("s6")=1;

NUdch2("s7")=1;

NUdch3("s1")=1.05;

NUdch3("s2")=1.05;

NUdch3("s3")=1.05;

NUdch3("s4")=1.05;

NUdch3("s5")=1.05;

NUdch3("s6")=1.05;

NUdch3("s7")=1.05;

NUdch4("s1")=1.1;

NUdch4("s2")=1.1;

NUdch4("s3")=1.1;

NUdch4("s4")=1.1;

NUdch4("s5")=1.1;

NUdch4("s6")=1.1;

NUdch4("s7")=1.1;

ElowES("s1")=2;

ElowES("s2")=2;

ElowES("s3")=2 ;

ElowES("s4")=2 ;

ElowES("s5")=2 ;

ElowES("s6")=2 ;

ElowES("s7")=2 ;

EhighES("s1")=10 ;

EhighES("s2")=10 ;

EhighES("s3")=10 ;

EhighES("s4")=10 ;

EhighES("s5")=10 ;

EhighES("s6")=10 ;

EhighES("s7")=10 ;

*----------------------------------------

PBarG("p1")=30;

PBarG("p2")=30;

PBarG("p3")=30;

PBarCH("p1")=10;

PBarCH("p2")=10;

PBarCH("p3")=10;

PBarDCH("p1")=10;

PBarDCH("p2")=10;

PBarDCH("p3")=10;

NUch1("p1")=0.95;

NUch1("p2")=0.95;

NUch1("p3")=0.95;

NUch2("p1")=1;

NUch2("p2")=1;

NUch2("p3")=1;

NUch3("p1")=1.05;

NUch3("p2")=1.05;

NUch3("p3")=1.05;

NUch4("p1")=1.1;

NUch4("p2")=1.1;

NUch4("p3")=1.1;

NUdch1("p1")=0.95;

NUdch1("p2")=0.95;

NUdch1("p3")=0.95;

NUdch2("p1")=1;

NUdch2("p2")=1;

NUdch2("p3")=1;

NUdch3("p1")=1.05;

NUdch3("p2")=1.05;

NUdch3("p3")=1.05;

NUdch4("p1")=1.1;

NUdch4("p2")=1.1;

NUdch4("p3")=1.1;

ElowES("p1")=4;

ElowES("p2")=4;

ElowES("p3")=4;

EhighES("p1")=20;

EhighES("p2")=20;

EhighES("p3")=20;

*----------------------------------------

PBarG("j1")=5;

PBarG("j2")=5;

PBarG("j3")=5;

PBarG("j4")=5;

PBarG("j5")=5;

PBarG("j6")=5;

PBarG("j7")=5;

PBarG("j8")=5;

PBarG("j9")=5;

PBarG("j10")=5;

PBarG("j11")=5;

PBarG("j12")=5;

PBarG("j13")=5;

PBarG("j14")=5;

PBarG("j15")=5;

PBarG("j16")=5;

PBarCH("j1")=2;

PBarCH("j2")=2;

PBarCH("j3")=2;

PBarCH("j4")=2;

PBarCH("j5")=2;

PBarCH("j6")=2;

PBarCH("j7")=2;

PBarCH("j8")=2;

PBarCH("j9")=2;

PBarCH("j10")=2;

PBarCH("j11")=2;

PBarCH("j12")=2;

PBarCH("j13")=2;

PBarCH("j14")=2;

PBarCH("j15")=2;

PBarCH("j16")=2;

PBarDCH("j1")=2;

PBarDCH("j2")=2;

PBarDCH("j3")=2;

PBarDCH("j4")=2;

PBarDCH("j5")=2;

PBarDCH("j6")=2;

PBarDCH("j7")=2;

PBarDCH("j8")=2;

PBarDCH("j9")=2;

PBarDCH("j10")=2;

PBarDCH("j11")=2;

PBarDCH("j12")=2;

PBarDCH("j13")=2;

PBarDCH("j14")=2;

PBarDCH("j15")=2;

PBarDCH("j16")=2;

NUch1("j1")=0.95;

NUch1("j2")=0.95;

NUch1("j3")=0.95;

NUch1("j4")=0.95;

NUch1("j5")=0.95;

NUch1("j6")=0.95;

NUch1("j7")=0.95;

NUch1("j8")=0.95;

NUch1("j9")=0.95;

NUch1("j10")=0.95;

NUch1("j11")=0.95;

NUch1("j12")=0.95;

NUch1("j13")=0.95;

NUch1("j14")=0.95;

NUch1("j15")=0.95;

NUch1("j16")=0.95;

NUch2("j1")=1;

NUch2("j2")=1;

NUch2("j3")=1;

NUch2("j4")=1;

NUch2("j5")=1;

NUch2("j6")=1;

NUch2("j7")=1;

NUch2("j8")=1;

NUch2("j9")=1;

NUch2("j10")=1;

NUch2("j11")=1;

NUch2("j12")=1;

NUch2("j13")=1;

NUch2("j14")=1;

NUch2("j15")=1;

NUch2("j16")=1;

NUch3("j1")=1.05;

NUch3("j2")=1.05;

NUch3("j3")=1.05;

NUch3("j4")=1.05;

NUch3("j5")=1.05;

NUch3("j6")=1.05;

NUch3("j7")=1.05;

NUch3("j8")=1.05;

NUch3("j9")=1.05;

NUch3("j10")=1.05;

NUch3("j11")=1.05;

NUch3("j12")=1.05;

NUch3("j13")=1.05;

NUch3("j14")=1.05;

NUch3("j15")=1.05;

NUch3("j16")=1.05;

NUch4("j1")=1.1;

NUch4("j2")=1.1;

NUch4("j3")=1.1;

NUch4("j4")=1.1;

NUch4("j5")=1.1;

NUch4("j6")=1.1;

NUch4("j7")=1.1;

NUch4("j8")=1.1;

NUch4("j9")=1.1;

NUch4("j10")=1.1;

NUch4("j11")=1.1;

NUch4("j12")=1.1;

NUch4("j13")=1.1;

NUch4("j14")=1.1;

NUch4("j15")=1.1;

NUch4("j16")=1.1;

NUdch1("j1")=0.95;

NUdch1("j2")=0.95;

NUdch1("j3")=0.95;

NUdch1("j4")=0.95;

NUdch1("j5")=0.95;

NUdch1("j6")=0.95;

NUdch1("j7")=0.95;

NUdch1("j8")=0.95;

NUdch1("j9")=0.95;

NUdch1("j10")=0.95;

NUdch1("j11")=0.95;

NUdch1("j12")=0.95;

NUdch1("j13")=0.95;

NUdch1("j14")=0.95;

NUdch1("j15")=0.95;

NUdch1("j16")=0.95;

NUdch2("j1")=1;

NUdch2("j2")=1;

NUdch2("j3")=1;

NUdch2("j4")=1;

NUdch2("j5")=1;

NUdch2("j6")=1;

NUdch2("j7")=1;

NUdch2("j8")=1;

NUdch2("j9")=1;

NUdch2("j10")=1;

NUdch2("j11")=1;

NUdch2("j12")=1;

NUdch2("j13")=1;

NUdch2("j14")=1;

NUdch2("j15")=1;

NUdch2("j16")=1;

NUdch3("j1")=1.05;

NUdch3("j2")=1.05;

NUdch3("j3")=1.05;

NUdch3("j4")=1.05;

NUdch3("j5")=1.05;

NUdch3("j6")=1.05;

NUdch3("j7")=1.05;

NUdch3("j8")=1.05;

NUdch3("j9")=1.05;

NUdch3("j10")=1.05;

NUdch3("j11")=1.05;

NUdch3("j12")=1.05;

NUdch3("j13")=1.05;

NUdch3("j14")=1.05;

NUdch3("j15")=1.05;

NUdch3("j16")=1.05;

NUdch4("j1")=1.1;

NUdch4("j2")=1.1;

NUdch4("j3")=1.1;

NUdch4("j4")=1.1;

NUdch4("j5")=1.1;

NUdch4("j6")=1.1;

NUdch4("j7")=1.1;

NUdch4("j8")=1.1;

NUdch4("j9")=1.1;

NUdch4("j10")=1.1;

NUdch4("j11")=1.1;

NUdch4("j12")=1.1;

NUdch4("j13")=1.1;

NUdch4("j14")=1.1;

NUdch4("j15")=1.1;

NUdch4("j16")=1.1;

ElowES("j1")=1;

ElowES("j2")=1;

ElowES("j3")=1;

ElowES("j4")=1;

ElowES("j5")=1;

ElowES("j6")=1;

ElowES("j7")=1;

ElowES("j8")=1;

ElowES("j9")=1;

ElowES("j10")=1;

ElowES("j11")=1;

ElowES("j12")=1;

ElowES("j13")=1;

ElowES("j14")=1;

ElowES("j15")=1;

ElowES("j16")=1;

EhighES("j1")=5;

EhighES("j2")=5;

EhighES("j3")=5;

EhighES("j4")=5;

EhighES("j5")=5;

EhighES("j6")=5;

EhighES("j7")=5;

EhighES("j8")=5;

EhighES("j9")=5;

EhighES("j10")=5;

EhighES("j11")=5;

EhighES("j12")=5;

EhighES("j13")=5;

EhighES("j14")=5;

EhighES("j15")=5;

EhighES("j16")=5;

*----------------------------------------

*----------------------------------------

*----------------------------------------

*----------------------------------------

ceRM1(s,p,k,o,t)=uniformint(5,6);

ceRM2(s,p,k,o,t)=uniformint(6,7);

ceRM3(s,p,k,o,t)=uniformint(7,8);

ceRM4(s,p,k,o,t)=uniformint(8,9);

*----------------------------------------

ceT1(s,p,k,o,t)=.12;

ceT2(s,p,k,o,t)=.14;

ceT3(s,p,k,o,t)=.16;

ceT4(s,p,k,o,t)=.18;

*----------------------------------------

ceP1(p,j,k,o,t)=uniformint(5,6);

ceP2(p,j,k,o,t)=uniformint(6,7);

ceP3(p,j,k,o,t)=uniformint(7,8);

ceP4(p,j,k,o,t)=uniformint(8,9);

*----------------------------------------

ceH1(j,k,t)=uniformint(2,3);

ceH2(j,k,t)=uniformint(3,4);

ceH3(j,k,t)=uniformint(4,5);

ceH4(j,k,t)=uniformint(5,6);

*----------------------------------------

ceT11(p,j,k,o,t)=.12;

ceT12(p,j,k,o,t)=.14;

ceT13(p,j,k,o,t)=.16;

ceT14(p,j,k,o,t)=.18;

*----------------------------------------

ceT21(j,m,k,o,t)=.12;

ceT22(j,m,k,o,t)=.14;

ceT23(j,m,k,o,t)=.16;

ceT24(j,m,k,o,t)=.18;

*----------------------------------------

*----------------------------------------

*----------------------------------------

*----------------------------------------

AlphaRM1(s,p,k,o,t)=uniformint(7,8);

AlphaRM2(s,p,k,o,t)=uniformint(8,9);

AlphaRM3(s,p,k,o,t)=uniformint(9,10);

AlphaRM4(s,p,k,o,t)=uniformint(10,11);

AlphaT1(s,p,k,o,t)=uniformint(1,2);

AlphaT2(s,p,k,o,t)=uniformint(2,3);

AlphaT3(s,p,k,o,t)=uniformint(3,4);

AlphaT4(s,p,k,o,t)=uniformint(4,5);

AlphaP1(p,j,k,o,t)=uniformint(15,16);

AlphaP2(p,j,k,o,t)=uniformint(16,17);

AlphaP3(p,j,k,o,t)=uniformint(17,18);

AlphaP4(p,j,k,o,t)=uniformint(18,19);

AlphaT11(P,j,k,o,t)=uniformint(0,2);

AlphaT12(P,j,k,o,t)=uniformint(2,4);

AlphaT13(P,j,k,o,t)=uniformint(4,6);

AlphaT14(P,j,k,o,t)=uniformint(6,8);

AlphaT21(j,m,k,o,t)=uniformint(0,3);

AlphaT22(j,m,k,o,t)=uniformint(3,5);

AlphaT23(j,m,k,o,t)=uniformint(5,7);

AlphaT24(j,m,k,o,t)=uniformint(7,9)

;

parameters fi1,fi2,fi3,fi4,vi,kisi1,kp1,kp2,kp3,kp4,ZProfitMax,ZDustMin;

fi1=0.8;

fi2=0.8;

fi3=0.8;

fi4=0.8;

vi=0.6;

kisi1=0.5;

kp1=0.3;

kp2=0.2;

kp3=0.2;

kp4=0.3;

ZProfitMax=1.30385E+10 ;

ZDustMin=269969.000

;

variables

ZProfit

ZDust

zz

WSM

Finalobj

WSMMax

WSMMin

ZProfitA

ZProfitB

ZDustA

ZDustB

;

positive variables

x(s,p,k,o,t)

x1(p,j,k,o,t)

x2(j,m,k,o,t)

MetDemand

ppG(i,t,tp)

ppCH(i,t,tp)

ppDCH(i,t,tp)

ppMarket(t,tp)

ppMarket1(i,t,tp)

Ees(i,t,tp)

APED1(i,t,tp)

BPED1(i,t,tp)

CPED1(i,t,tp)

APED(i,t)

BPED(i,t)

CPED(i,t)

;

binary variables

y(s,k)

y1(p)

;

equations

obj1

obj2

e1

e2

e3

e4

e5

e6

e7

e8

co3

co4

co5

co6

co7

co8

co9

co10

co11

co12

co13

co14

co15

co16

co17

co18

co19

co20

co21

co22

co23

co24

co25

co26

co27

co28

co29

co30

co31

co32

co33

co34

co35

co36

co37

co38

co39

co40

co41

co42

co43

co44

co45

co46

co47

co48

co49

co50

co51

co52

co53

co54

co55

CO56

CO57

*CO58

*co59

;

obj1 .. ZProfit=e=sum((j,m,k,o,t),Landa(m,k,t)*x2(j,m,k,o,t))-

{sum((s,p,k,o,t),((cRM1(s,p,k,o,t)+cRM2(s,p,k,o,t)+cRM3(s,p,k,o,t)+cRM4(s,p,k,o,t))/4)*x(s,p,k,o,t))

+sum((p,j,k,o,t),((cP1(k,t)+cP2(k,t)+cP3(k,t)+cP4(k,t))/4)*x1(p,j,k,o,t))

+sum((p,j,k,o,t),((cH1(j,k,t)+cH2(j,k,t)+cH3(j,k,t)+cH4(j,k,t))/4)*x1(p,j,k,o,t))

+sum((s,p,k,o,t),((cT1(s,p,k,o,t)+cT2(s,p,k,o,t)+cT3(s,p,k,o,t)+cT4(s,p,k,o,t))/4)*x(s,p,k,o,t))

+sum((p,j,k,o,t),((cT11(p,j,k,o,t)+cT12(p,j,k,o,t)+cT13(p,j,k,o,t)+cT14(p,j,k,o,t))/4)*x1(p,j,k,o,t))

+sum((j,m,k,o,t),((cT21(j,m,k,o,t)+cT22(j,m,k,o,t)+cT23(j,m,k,o,t)+cT24(j,m,k,o,t))/4)*x2(j,m,k,o,t))

+Phi*(sum((t,tp),(sum(i,((RhoG1(i,t,tp)+RhoG2(i,t,tp)+RhoG3(i,t,tp)+RhoG4(i,t,tp))/4)*ppG(i,t,tp)+((RhoCH1(i,t,tp)+RhoCH2(i,t,tp)+RhoCH3(i,t,tp)+RhoCH4(i,t,tp))/4)*ppCH(i,t,tp)+((RhoDC1(i,t,tp)+RhoDC2(i,t,tp)+RhoDC3(i,t,tp)+RhoDC4(i,t,tp))/4)*ppDCH(i,t,tp)))+((RhoMarket1(t,tp)+RhoMarket2(t,tp)+RhoMarket3(t,tp)+RhoMarket4(t,tp))/4)*ppMarket(t,tp)))};

obj2 .. ZDust=e=sum((s,p,k,o,t),((AlphaRM1(s,p,k,o,t)+AlphaRM2(s,p,k,o,t)+AlphaRM3(s,p,k,o,t)+AlphaRM4(s,p,k,o,t))/4)*x(s,p,k,o,t))

+sum((s,p,k,o,t),((AlphaT1(s,p,k,o,t)+AlphaT2(s,p,k,o,t)+AlphaT3(s,p,k,o,t)+AlphaT4(s,p,k,o,t))/4)*x(s,p,k,o,t))+sum((p,j,k,o,t),((AlphaP1(p,j,k,o,t)+AlphaP2(p,j,k,o,t)+AlphaP3(p,j,k,o,t)+AlphaP4(p,j,k,o,t))/4)*x1(p,j,k,o,t))

+sum((p,j,k,o,t),((AlphaT11(p,j,k,o,t)+AlphaT12(p,j,k,o,t)+AlphaT13(p,j,k,o,t)+AlphaT14(p,j,k,o,t))/4)*x1(p,j,k,o,t))

+sum((j,m,k,o,t),((AlphaT21(j,m,k,o,t)+AlphaT22(j,m,k,o,t)+AlphaT23(j,m,k,o,t)+AlphaT24(j,m,k,o,t))/4)*x2(j,m,k,o,t));

e1 .. WSM=e=vi*((ZProfitMax-ZProfit)/ZProfitMax)+(1-vi)*((ZDust-ZDustMin)/ZDustMin);

e2 .. Finalobj=e=WSM+kisi1*(WSMMax-WSMMin)+sum(i,kp1*(NUch3(i)+fi1*NUch2(i)+(1-fi1)*NUch1(i)-fi1*NUch4(i)-(1-fi1)*NUch3(i)-NUch1(i)))

+sum((i,t),kp2*(GammaAP3(i,t)+fi2*GammaAP2(i,t)+(1-fi2)*GammaAP1(i,t)-fi2*GammaAP4(i,t)-(1-fi2)*GammaAP3(i,t)-GammaAP1(i,t)))

+sum((i,t),kp2*(GammaBP3(i,t)+fi2*GammaBP2(i,t)+(1-fi2)*GammaBP1(i,t)-fi2*GammaBP4(i,t)-(1-fi2)*GammaBP3(i,t)-GammaBP1(i,t)))

+sum((i,t),kp2*(GammaCP3(i,t)+fi2*GammaCP2(i,t)+(1-fi2)*GammaCP1(i,t)-fi2*GammaCP4(i,t)-(1-fi2)*GammaCP3(i,t)-GammaCP1(i,t)))

+Sum((m,k,t),kp3*(D4(m,k,t)-(1-fi3)*D3(m,k,t)-fi3*D4(m,k,t)))

+kp4*(sum((s,p,k,o,t),(ceRM2(s,p,k,o,t)-(1-fi3)*ceRM1(s,p,k,o,t)-ceRM1(s,p,k,o,t)))+sum((s,p,k,o,t),(ceT2(s,p,k,o,t)-(1-fi3)*ceT1(s,p,k,o,t)-ceT1(s,p,k,o,t)))

+sum((p,j,k,o,t),(ceP2(p,j,k,o,t)-(1-fi3)*ceP1(p,j,k,o,t)-ceP1(p,j,k,o,t))));

e3 .. WSMMax=e=vi*((ZProfitMax-ZProfitA)/ZProfitMax)+(1-vi)*((ZDustA- ZDustMin)/ZDustMin);

e4 .. WSMMin=e=vi*((ZProfitMax-ZProfitB)/ZProfitMax)+(1-vi)*((ZDustB- ZDustMin)/ZDustMin);

e5 .. ZProfitA=e=sum((j,m,k,o,t),Landa(m,k,t)*x2(j,m,k,o,t))-{sum((s,p,k,o,t),(cRM4(s,p,k,o,t))*x(s,p,k,o,t))

+sum((p,j,k,o,t),(cP4(k,t))*x1(p,j,k,o,t))

+sum((p,j,k,o,t),(cH4(j,k,t))*x1(p,j,k,o,t))

+sum((s,p,k,o,t),(cT4(s,p,k,o,t))*x(s,p,k,o,t))

+sum((p,j,k,o,t),(cT14(p,j,k,o,t))*x1(p,j,k,o,t))

+sum((j,m,k,o,t),(cT24(j,m,k,o,t))*x2(j,m,k,o,t))

+Phi*(sum((t,tp),(sum(i,(RhoG4(i,t,tp))*ppG(i,t,tp)+(RhoCH4(i,t,tp))*ppCH(i,t,tp)+(RhoDC4(i,t,tp))*ppDCH(i,t,tp)))+(RhoMarket4(t,tp))*ppMarket(t,tp)))};

e6 .. ZProfitB=e=sum((j,m,k,o,t),Landa(m,k,t)*x2(j,m,k,o,t))-{sum((s,p,k,o,t),(cRM1(s,p,k,o,t))*x(s,p,k,o,t))

+sum((p,j,k,o,t),(cP1(k,t))*x1(p,j,k,o,t))

+sum((p,j,k,o,t),(cH1(j,k,t))*x1(p,j,k,o,t))

+sum((s,p,k,o,t),(cT1(s,p,k,o,t))*x(s,p,k,o,t))

+sum((p,j,k,o,t),(cT11(p,j,k,o,t))*x1(p,j,k,o,t))

+sum((j,m,k,o,t),(cT21(j,m,k,o,t))*x2(j,m,k,o,t))

+Phi*(sum((t,tp),(sum(i,(RhoG1(i,t,tp))*ppG(i,t,tp)+(RhoCH1(i,t,tp))*ppCH(i,t,tp)+(RhoDC1(i,t,tp))*ppDCH(i,t,tp)))+(RhoMarket1(t,tp))*ppMarket(t,tp)))};

e7 .. ZDustA=e=sum((s,p,k,o,t),(AlphaRM4(s,p,k,o,t))*x(s,p,k,o,t))

+sum((s,p,k,o,t),(AlphaT4(s,p,k,o,t))*x(s,p,k,o,t))+sum((p,j,k,o,t),(AlphaP4(p,j,k,o,t))*x1(p,j,k,o,t))

+sum((p,j,k,o,t),(AlphaT14(p,j,k,o,t))*x1(p,j,k,o,t))

+sum((j,m,k,o,t),(AlphaT24(j,m,k,o,t))*x2(j,m,k,o,t));

e8 .. ZDustB=e=sum((s,p,k,o,t),(AlphaRM1(s,p,k,o,t))*x(s,p,k,o,t))

+sum((s,p,k,o,t),(AlphaT1(s,p,k,o,t))*x(s,p,k,o,t))+sum((p,j,k,o,t),(AlphaP1(p,j,k,o,t))*x1(p,j,k,o,t))

+sum((p,j,k,o,t),(AlphaT11(p,j,k,o,t))*x1(p,j,k,o,t))

+sum((j,m,k,o,t),(AlphaT21(j,m,k,o,t))*x2(j,m,k,o,t));

co3(i,t,tp)$(Ni1(i)) .. 0=l=ppG(i,t,tp);

co4(i,t,tp)$(Ni1(i)) .. ppG(i,t,tp)=l=PBarG(i);

co5(i,t,tp)$(Ni2(i)) .. 0=l=ppG(i,t,tp);

co6(i,t,tp)$(Ni2(i)) .. ppG(i,t,tp)=l=PBarG(i);

co7(i,t,tp)$(Ni3(i)) .. 0=l=ppG(i,t,tp);

co8(i,t,tp)$(Ni3(i)) .. ppG(i,t,tp)=l=PBarG(i);

co9(i,t,tp)$(Ni1(i)) .. 0=l=ppCH(i,t,tp);

co10(i,t,tp)$(Ni1(i)) .. ppCH(i,t,tp)=l=PBarCH(i);

co11(i,t,tp)$(Ni2(i)) .. 0=l=ppCH(i,t,tp);

co12(i,t,tp)$(Ni2(i)) .. ppCH(i,t,tp)=l=PBarCH(i);

co13(i,t,tp)$(Ni3(i)) .. 0=l=ppCH(i,t,tp);

co14(i,t,tp)$(Ni3(i)) .. ppCH(i,t,tp)=l=PBarCH(i);

co15(i,t,tp)$(Ni1(i)) .. 0=l=ppDCH(i,t,tp);

co16(i,t,tp)$(Ni1(i)) .. ppDCH(i,t,tp)=l=PBarDCH(i);

co17(i,t,tp)$(Ni2(i)) .. 0=l=ppDCH(i,t,tp);

co18(i,t,tp)$(Ni2(i)) .. ppDCH(i,t,tp)=l=PBarDCH(i);

co19(i,t,tp)$(Ni3(i)) .. 0=l=ppDCH(i,t,tp);

co20(i,t,tp)$(Ni3(i)) .. ppDCH(i,t,tp)=l=PBarDCH(i);

co21(i,t,tp) .. Ees(i,t,tp)=g=Ees(i,t-1,tp)+ppCH(i,t,tp)*(fi1*NUch2(i)+(1-fi1)*NUch1(i))-(ppDCH(i,t,tp)/(fi1*NUdch2(i)+(1-fi1)*NUdch1(i)));

co22(i,t,tp) .. Ees(i,t,tp)=l=Ees(i,t-1,tp)+ppCH(i,t,tp)*(fi1*NUch4(i)+(1-fi1)*NUch3(i))-(ppDCH(i,t,tp)/(fi1*NUdch4(i)+(1-fi1)*NUdch3(i)));

co23(i,t,tp)$(Ni1(i)) .. ElowES(i)=l=Ees(i,t,tp);

co24(i,t,tp)$(Ni2(i)) .. ElowES(i)=l=Ees(i,t,tp);

co25(i,t,tp)$(Ni3(i)) .. ElowES(i)=l=Ees(i,t,tp);

co26(i,t,tp)$(Ni1(i)) .. Ees(i,t,tp)=l=EhighES(i);

co27(i,t,tp)$(Ni2(i)) .. Ees(i,t,tp)=l=EhighES(i);

co28(i,t,tp)$(Ni3(i)) .. Ees(i,t,tp)=l=EhighES(i);

co29(i,t,tp)$(Ni1(i)) .. ppG(i,t,tp)+ppDCH(i,t,tp)+ppMarket1(i,t,tp)=e=ppCH(i,t,tp)+APED1(i,t,tp);

co30(i,t,tp)$(Ni2(i)) .. ppG(i,t,tp)+ppDCH(i,t,tp)+ppMarket1(i,t,tp)=e=ppCH(i,t,tp)+BPED1(i,t,tp);

co31(i,t,tp)$(Ni3(i)) .. ppG(i,t,tp)+ppDCH(i,t,tp)+ppMarket1(i,t,tp)=e=ppCH(i,t,tp)+CPED1(i,t,tp);

co32(i,t,tp)$(Ni1(i)) .. APED1(i,t,tp)=e=APED(i,t)/(Phi*Omega);

co33(i,t,tp)$(Ni2(i)) .. BPED1(i,t,tp)=e=BPED(i,t)/(Phi*Omega);

co34(i,t,tp)$(Ni3(i)) .. CPED1(i,t,tp)=e=CPED(i,t)/(Phi*Omega);

co35(t,tp) .. ppMarket(t,tp)=e=sum(i,ppMarket1(i,t,tp));

co36(i,t)$(Ni1(i)) .. APED(i,t)=g=sum((s,p,k,o),(fi2*GammaAP2(i,t)+(1-fi2)*GammaAP1(i,t))*x(s,p,k,o,t));

co37(i,t)$(Ni1(i)) .. APED(i,t)=l=sum((s,p,k,o),(fi2*GammaAP4(i,t)+(1-fi2)*GammaAP3(i,t))*x(s,p,k,o,t));

co38(i,t)$(Ni2(i)) .. BPED(i,t)=g=sum((p,j,k,o),(fi2*GammaBP2(i,t)+(1-fi2)*GammaBP1(i,t))*x1(p,j,k,o,t));

co39(i,t)$(Ni2(i)) .. BPED(i,t)=l=sum((p,j,k,o),(fi2*GammaBP4(i,t)+(1-fi2)*GammaBP3(i,t))*x1(p,j,k,o,t));

co40(i,t)$(Ni3(i)) .. CPED(i,t)=g=sum((j,m,k,o),(fi2*GammaCP2(i,t)+(1-fi2)*GammaCP1(i,t))*x2(j,m,k,o,t));

co41(i,t)$(Ni3(i)) .. CPED(i,t)=l=sum((j,m,k,o),(fi2*GammaCP4(i,t)+(1-fi2)*GammaCP3(i,t))*x2(j,m,k,o,t));

co42(s,p,k,o,t)$(NS1(s)and NP1(p)and NK1(k)and NO1(O)) .. x(s,p,k,o,t)=g=sum(j$(NJ1(j)),x1(p,j,k,o,t));

co43(s,p,k,o,t)$(NS2(s)and NP2(p)and NK2(k)and NO2(O)) .. x(s,p,k,o,t)=g=sum(j$(NJ2(j)),x1(p,j,k,o,t));

co44(s,p,k,o,t)$(NS3(s)and NP3(p)and NK3(k)and NO3(O)) .. x(s,p,k,o,t)=g=sum(j$(NJ2(j)),x1(p,j,k,o,t));

co45(j,k,o,t)$(NJ1(j)and NK1(k)and NO1(O)) .. sum(p$(NP1(p)),x1(p,j,k,o,t))=g=sum(m,x2(j,m,k,o,t));

co46(j,k,o,t)$(NJ2(j)and NK2(k)and NO2(O)) .. sum(p$(NP2(p)),x1(p,j,k,o,t))=g=sum(m$(NM1(m)),x2(j,m,k,o,t));

co47(j,k,o,t)$(NJ2(j)and NK3(k)and NO3(O)) .. sum(p$(NP3(p)),x1(p,j,k,o,t))=g=sum(m$(NM1(m)),x2(j,m,k,o,t));

co48(s,k,t) .. sum((p,o),x(s,p,k,o,t))=l=cap1(s,k)*y(s,k)*1;

co49(p,t) .. sum((j,k,o),x1(p,j,k,o,t))=l=cap(p)*y1(p)*1;

Co50(m,k,t)$(NK1(k)) .. sum((j,o)$(NJ1(j)and NO1(O)),x2(j,m,k,o,t))=g=(1-fi3)*D3(m,k,t)+fi3*D4(m,k,t);

Co51(m,k,t)$(NM1(m)and NK2(k)) .. sum((j,o)$(NJ2(j)and NO2(O)),x2(j,m,k,o,t))=g=(1-fi3)*D3(m,k,t)+fi3*D4(m,k,t);

Co52(m,k,t)$(NM1(m)and NK3(k)) .. sum((j,o)$(NJ2(j)and NO3(O)),x2(j,m,k,o,t))=g=(1-fi3)*D3(m,k,t)+fi3*D4(m,k,t);

co53(k)$(NK1(k)) .. sum(s,y(s,k))=e=4;

co54(k)$(NK2(k)) .. sum(s,y(s,k))=e=6;

co55(k)$(NK3(k)) .. sum(s,y(s,k))=e=7;

co56 .. sum((j,m,k,o,t),x2(j,m,k,o,t))=e=MetDemand;

co57 .. sum((s,p,k,o,t),(fi4*ceRM2(s,p,k,o,t)+(1-fi4)*ceRM1(s,p,k,o,t))*x(s,p,k,o,t))+sum((s,p,k,o,t),(fi4*ceT2(s,p,k,o,t)+(1-fi4)*ceT1(s,p,k,o,t))*x(s,p,k,o,t))

+sum((p,j,k,o,t),(fi4*ceP2(p,j,k,o,t)+(1-fi4)*ceP1(p,j,k,o,t))*x1(p,j,k,o,t))

+sum((p,j,k,o,t),(fi4*ceH2(j,k,t)+(1-fi4)*ceH1(j,k,t))*x1(p,j,k,o,t))+sum((p,j,k,o,t),(fi4*ceT12(p,j,k,o,t)+(1-fi4)*ceT11(p,j,k,o,t))*x1(p,j,k,o,t))

+sum((j,m,k,o,t),(fi4*ceT22(j,m,k,o,t)+(1-fi4)*ceT21(j,m,k,o,t))*x2(j,m,k,o,t))=l=Ccap;

model ss1 /all/;

option optca=0,optcr=0,reslim=3600;

solve ss1 using mip min Finalobj;

display

ZDust.l

ZProfit.l

WSM.l

Finalobj.l

ZProfitA.l

ZProfitB.l

ZdustA.l

ZdustB.l

WSMMax.l

WSMMin.l

x2.l

y.l

y1.l

APED.l

BPED.l

CPED.l

;
